# Supplementary material for: A New Database of Extreme European Winter Windstorms
Source: Copernicus journal article supplement (doi:10.5194/essd-2024-298), 2024-10-08
Supplement: Supplementary file 1 [file essd-2024-298-supplement-version2.zip]

# Supplementary Material to *CLIMK–WINDS: A New Database of Extreme European Winter Windstorms*

Clare Marie Flynn<sup>1, 2</sup>, Julia Mömken<sup>3</sup>, Joaquim G. Pinto<sup>3</sup>, Michael Schutte<sup>1</sup>, and Gabriele Messori<sup>1,2,4</sup>

<sup>1</sup>Department of Earth Sciences, Uppsala University, Uppsala, Sweden

<sup>2</sup>Swedish Centre for Impacts of Climate Extremes (climes), Uppsala University, Uppsala, Sweden

<sup>3</sup>Institute of Meteorology and Climate Research, Karlsruhe Institute of Technology, Karlsruhe, Germany

<sup>4</sup>Department of Meteorology and Bolin Centre for Climate Research, Stockholm University, Stockholm, Sweden

Please see the further supplementary file [Top50Storms\\_All\\_Summary.csv](#) for a full list of all Top50 storms identified from each of the four input data sets, and if they were found in the XWS and C3S databases. As in the main text, the Top50 windstorms are listed with their names, dates of occurrence, and ordinal rank (rank 1 = most extreme storm, rank 50 = least extreme storm). A storm name in parentheses indicates that the same storm had two different names, while a hyphenated name indicates that two individual storms could not be separated from each other within the database and are treated as a single storm. For storms lacking given names and thus named after their date of occurrence, the ERA5 date was preferred.

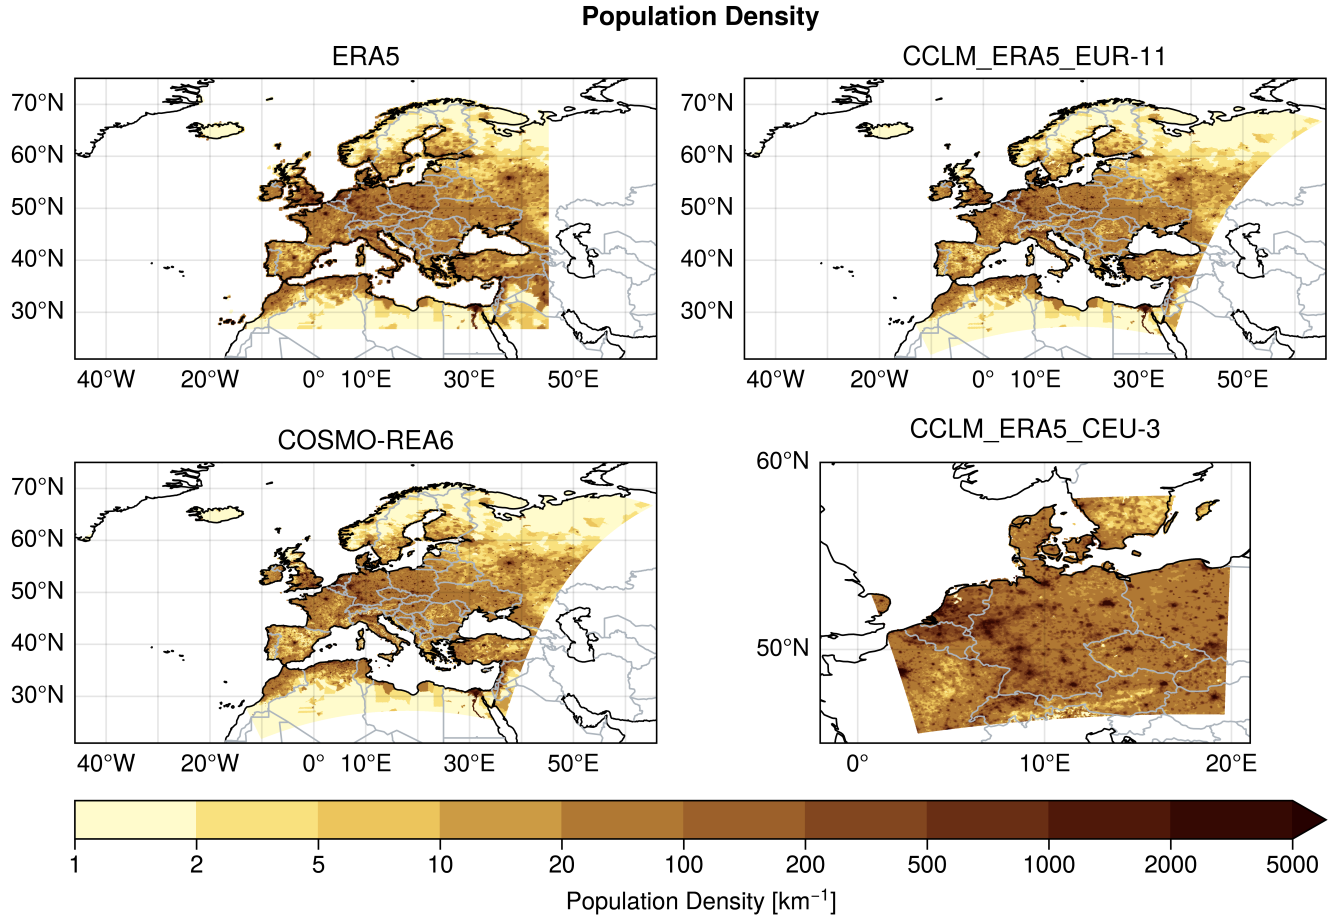

**Figure 1.** Population density after regridding the Gridded Population of the World, version 4 (GPWv4) population density data set for the year 2020 (CIESIN, 2018) to the resolutions of the four input data sets: ERA5, CCLM\_ERA5\_EUR-11, COSMO-REA6, and CCLM\_ERA5\_CEU-3. For more details the reader is referred to section 2.3 in the main article.

## Common Storm Footprint Loss Index

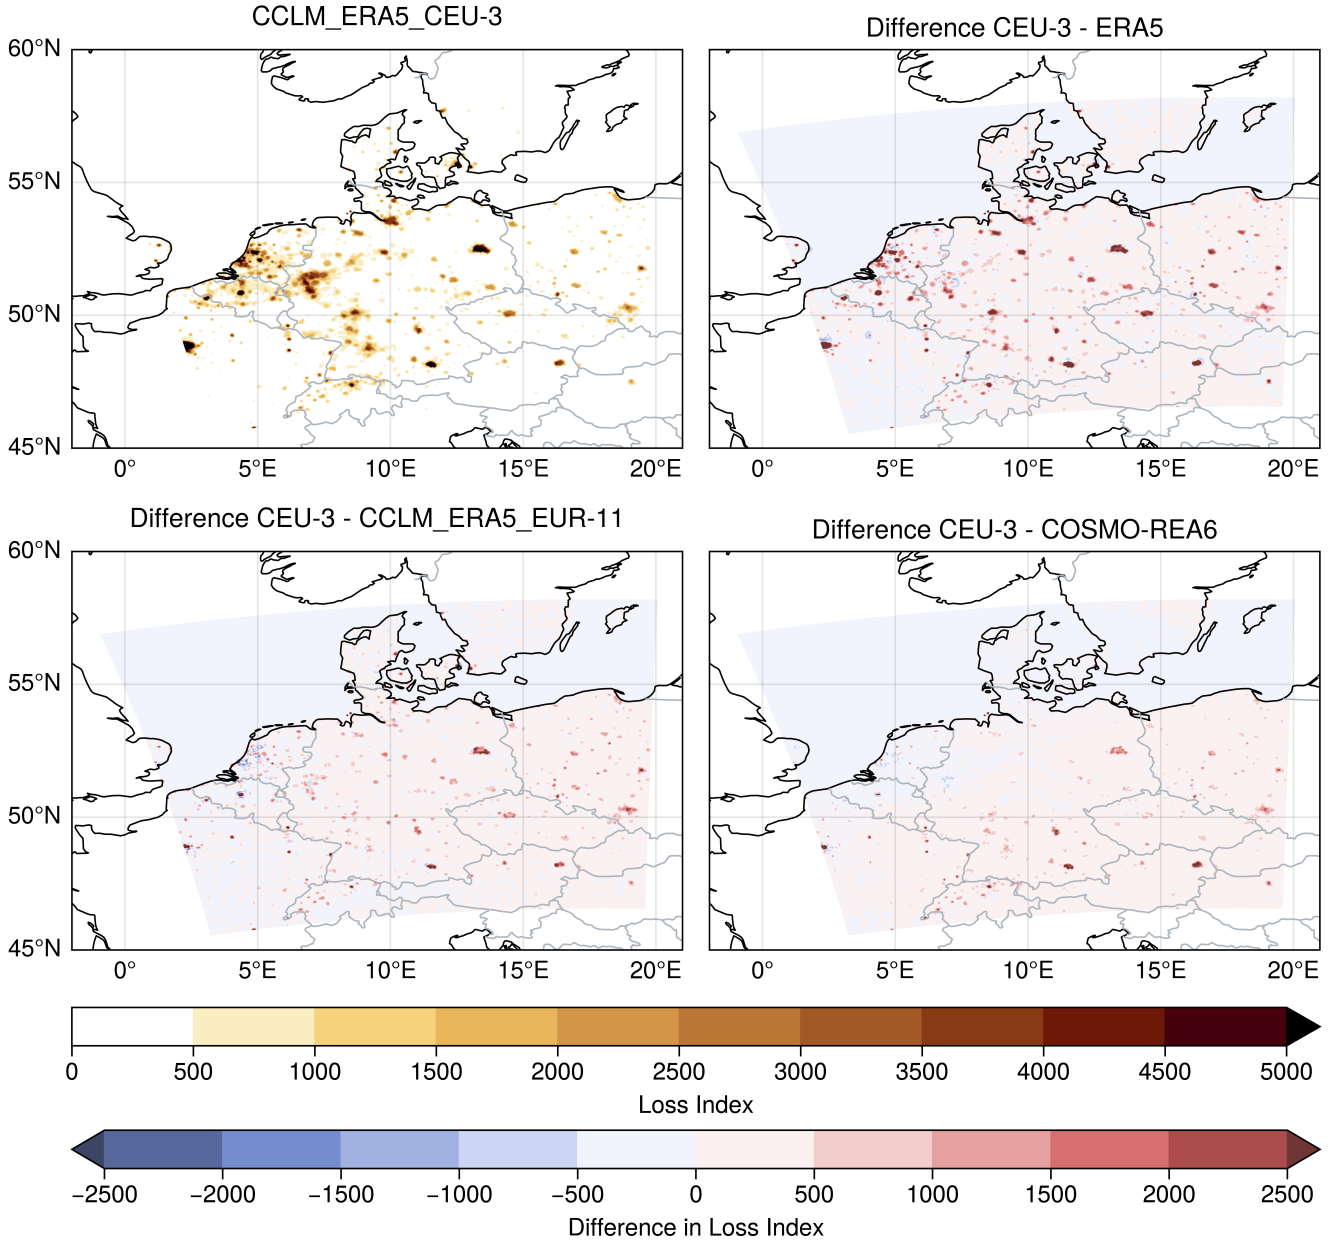

**Figure 2.** Mean storm footprint Loss Index, computed over the common storms for CCLM\_ERA5\_CEU-3 (shading, top left). Shading in the other sub-panels shows the difference in common storm footprint loss index between CCLM\_ERA5\_CEU-3 and, in clockwise order, ERA5, COSMO-REA6, and CCLM\_ERA5\_EUR-11. For more details the reader is referred to section 2.3 in the main article.

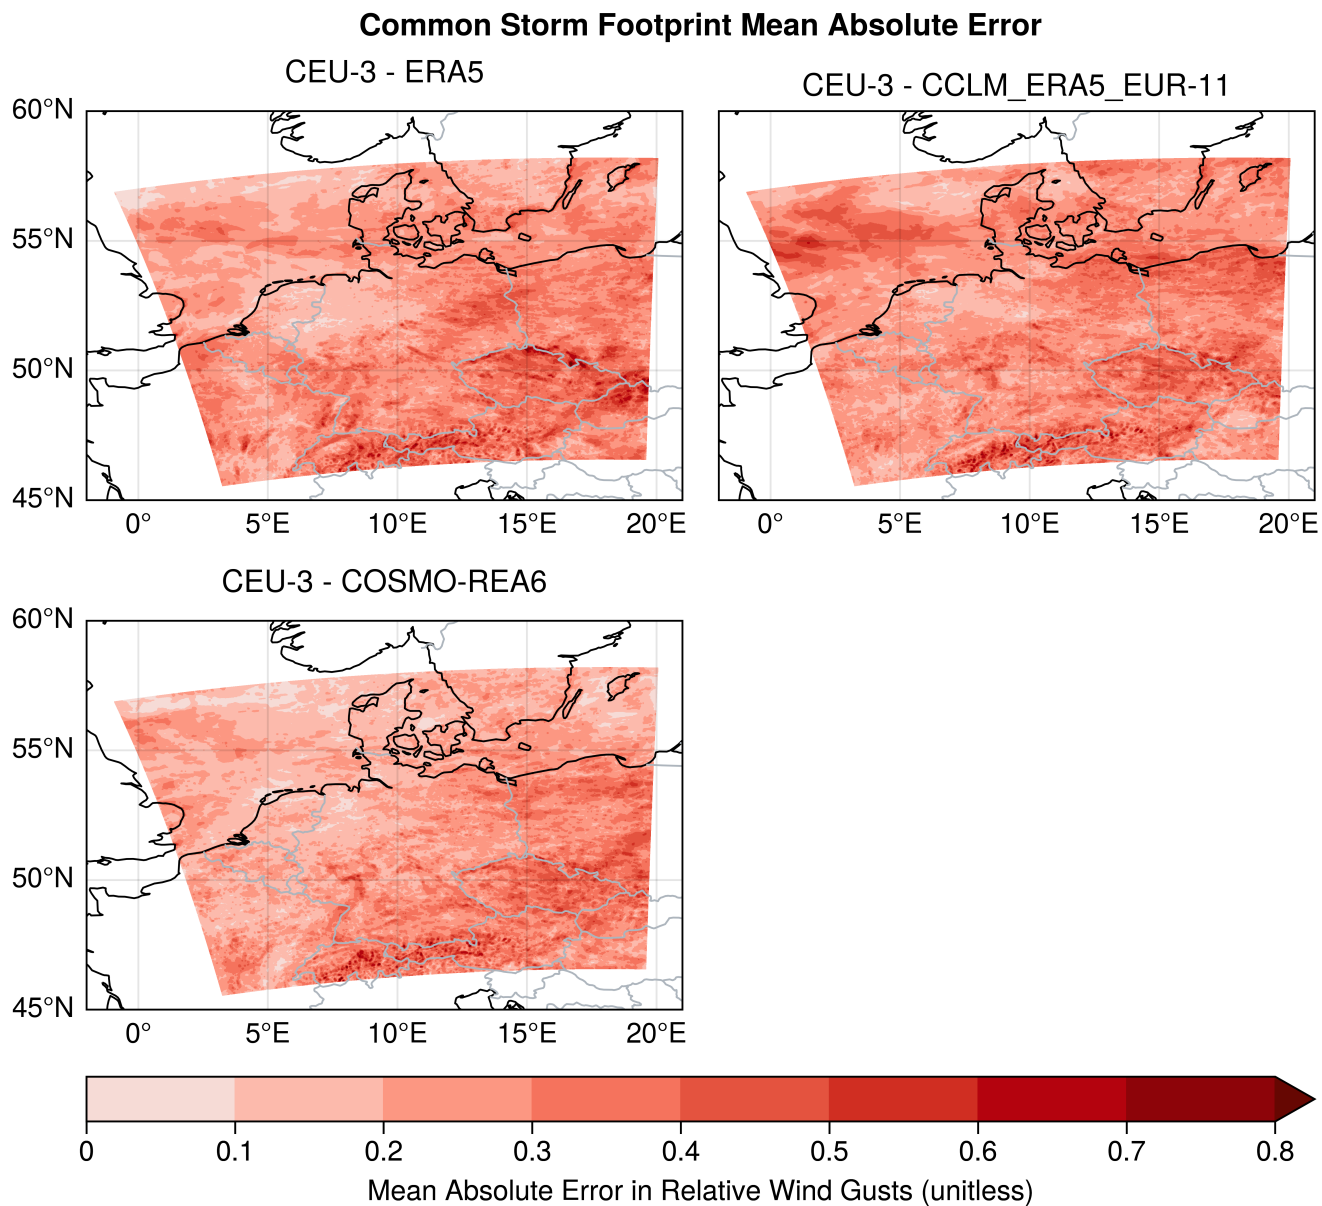

**Figure 3.** As Figure 8 in the main text but for mean absolute error of relative wind gusts (unitless).



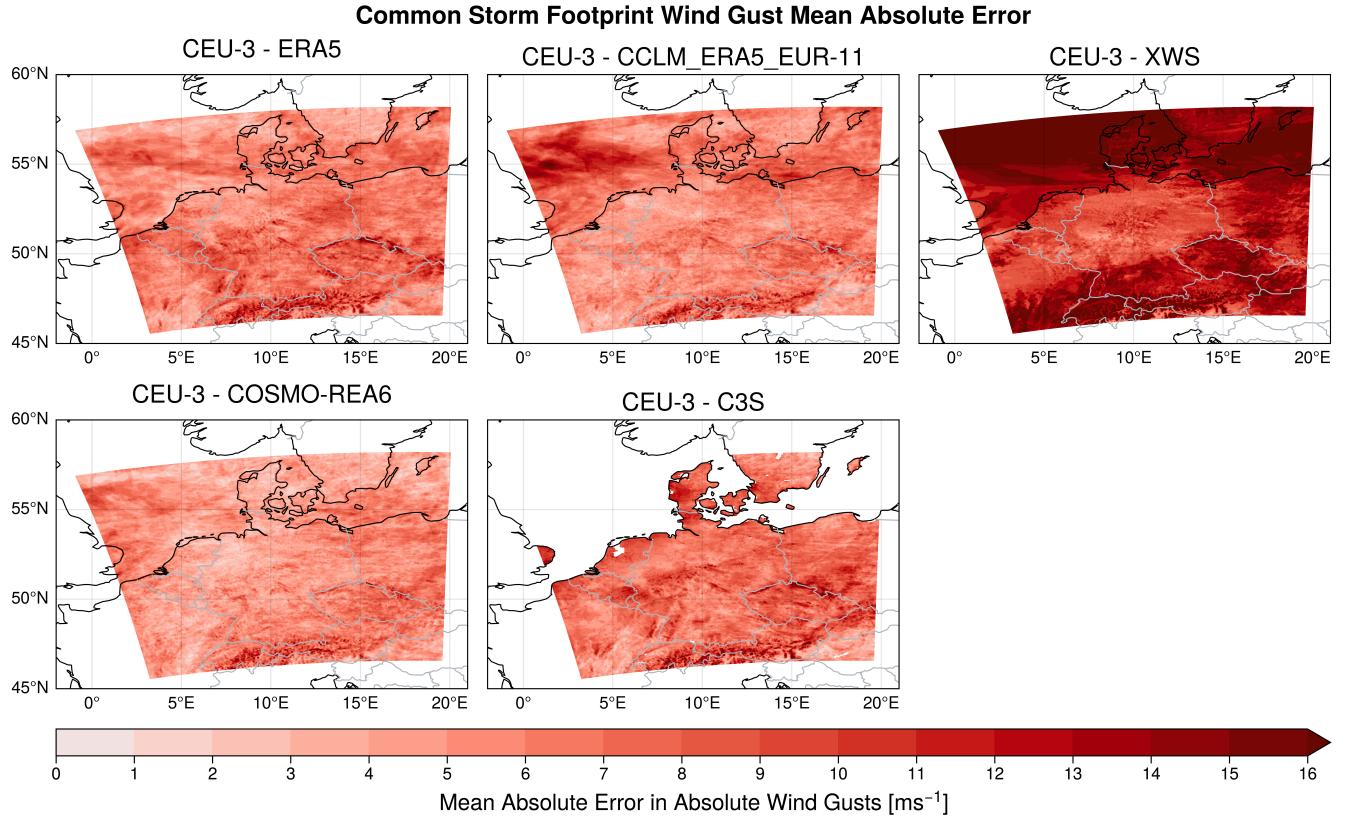

**Figure 4.** As Figure 9 in the main text but for mean absolute error of daily maximum wind gusts ( $\text{m s}^{-1}$ ).

## References

CIESIN: Gridded Population of the World, Version 4 (GPWv4): Population Density, Revision 11, Palisades, New York: NASA Socioeconomic Data and Applications Center (SEDAC), <https://doi.org/10.7927/H49C6VHW>, 2018.
